# 1 Identifying and correcting repeat-calling errors in nanopore sequencing of 2 telomeres

3

4 Kar-Tong Tan<sup>1,2,3</sup>, Michael K. Slevin<sup>1,4</sup>, Matthew Meyerson<sup>1,2,3,4,#</sup>, Heng Li<sup>5,6,#</sup>

5 <sup>1</sup>Department of Medical Oncology, Dana-Farber Cancer Institute, Boston, MA, USA

6 <sup>2</sup>Cancer Program, Broad Institute of MIT and Harvard, Cambridge, MA, USA

7 <sup>3</sup>Department of Genetics, Harvard Medical School, Boston, MA, USA

8 <sup>4</sup>Center for Cancer Genomics, Dana-Farber Cancer Institute, Boston, MA, USA

9 <sup>5</sup>Department of Data Sciences, Dana-Farber Cancer Institute, Boston, MA, USA

10 <sup>6</sup>Department of Biomedical Informatics, Harvard Medical School, Boston, MA, USA

11

12 #Correspondence to [matthew\\_meyerson@dfci.harvard.edu](mailto:matthew_meyerson@dfci.harvard.edu) or [hli@jimmy.harvard.edu](mailto:hli@jimmy.harvard.edu)

13

14

## 15 Abstract

16

17 Nanopore long-read genome sequencing is emerging as a potential approach for the study of  
18 genomes including long repetitive elements like telomeres. Here, we report extensive  
19 basecalling induced errors at telomere repeats across nanopore datasets, sequencing platforms,  
20 basecallers, and basecalling models. We found that telomeres which are represented by  
21 (TTAGGG)<sub>n</sub> and (CCCTAA)<sub>n</sub> repeats in many organisms were frequently miscalled (~40-50% of  
22 reads) as (TTAAAA)<sub>n</sub>, or as (CTTCTT)<sub>n</sub> and (CCCTGG)<sub>n</sub> repeats respectively in a strand-  
23 specific manner during nanopore sequencing. We showed that this miscalling is likely caused by  
24 the high similarity of current profiles between telomeric repeats and these repeat artefacts,  
25 leading to mis-assignment of electrical current profiles during basecalling. We further  
26 demonstrated that tuning of nanopore basecalling models, and selective application of the tuned  
27 models to telomeric reads led to improved recovery and analysis of telomeric regions, with little  
28 detected negative impact on basecalling of other genomic regions. Our study thus highlights the  
29 importance of verifying nanopore basecalls in long, repetitive, and poorly defined regions of the  
30 genome, and showcases how such artefacts in regions like telomeres can potentially be  
31 resolved by improvements in nanopore basecalling models.

32

33

34

## 35 Keywords

36

37 Nanopore-sequencing, long-reads, telomere, basecalling

38

39

## 40 Background

41  
42 Telomeres are protective caps found on chromosomal ends, and are known to play critical roles  
43 in a wide range of biological processes and human diseases [1,2]. These highly repetitive  
44 structures enable cells to deal with the “end-replication problem” through the action of  
45 telomerase which adds telomeric repeats to the ends of chromosomes. In cancer, the  
46 reactivation of telomerase to drive telomere elongation is estimated to occur in as many as 90%  
47 of human cancers, and has been shown experimentally to be critical for malignant  
48 transformation [3–8]. As one ages, telomeres are also known to progressively shorten, and are  
49 thus thought to also play a central role in the process of aging [9–11]. In many organisms,  
50 telomeres are characterized by (TTAGGG)<sub>n</sub> repeats that vary in length of between 2 and 20kb  
51 long, which are not readily resolved by short-read sequencing approaches. Given the  
52 importance of telomeres in a wide range of biological process and the technical challenges  
53 associated with their analysis using short-read sequencing, there is significant interest in  
54 applying emerging techniques like long-read sequencing to study these repetitive structures.

55  
56 Long-read sequencing has emerged as a powerful technology for the study of long repetitive  
57 elements in the genome. Two main platforms, Single Molecule Real Time (SMRT) sequencing,  
58 and Nanopore sequencing, have been developed to generate sequence reads of over 10  
59 kilobases from DNA molecules [12,13]. In SMRT Sequencing, the incorporation of DNA  
60 nucleotides is captured real time via one of four different fluorescent dyes attached to each of  
61 the four DNA bases, thereby allowing the corresponding DNA sequence to be inferred.  
62 Sequencing of the same DNA molecule multiple times in a circular manner further allows highly  
63 accurate consensus sequence of the DNA molecule to be generated in a process termed Pacific  
64 Biosciences (PacBio) High-Fidelity (HiFi) sequencing [12]. During Nanopore sequencing, the  
65 ionic current, which varies according to the DNA sequence, is measured while a single-stranded  
66 DNA molecule passes through a nanopore channel. The electrical current measurement is then  
67 converted into the corresponding DNA sequence using a deep neural network trained on a  
68 collection of ionic current profiles of known DNA sequences [13]. Notably, both platforms enable  
69 long DNA molecules of more than 10 kilo-base-pairs to be routinely sequenced and are thus  
70 highly suited for the study of long repetitive elements like telomeres.

## 71 72 73 Results and discussion

74  
75 In our analysis of telomeric regions with nanopore long-read sequencing in the recently  
76 sequenced and assembled CHM13 sample [14,15], we surprisingly observed that telomeric  
77 regions were frequently miscalled as other types of repeats in a strand-specific manner.  
78 Specifically, although human telomeres are typically represented by (TTAGGG)<sub>n</sub> repeats  
79 **(Supplementary Figure 1a)**, these regions were frequently recorded as (TTAAAA)<sub>n</sub> repeats  
80 **(Figure 1a,b, Supplementary Figure 1 and 2a)**. At the same time, when examining the reverse  
81 complementary strand of the telomeres which are represented as (CCCTAA)<sub>n</sub> repeats, we  
82 instead observed frequent substitution of these regions by (CTTCTT)<sub>n</sub> and (CCCTGG)<sub>n</sub> repeats  
83 **(Figure 1a,b, Supplementary Figure 1 and 2b,c)**. Notably, these artefacts were not observed  
84 on the CHM13 reference genome [14,15], or PacBio HiFi reads from the same site **(Figure**  
85 **1a,b)**, suggesting that these observed repeats are artefacts of Nanopore sequencing or the  
86 base-calling process, rather than real biological variations of telomeres. Further, these repeat-  
87 calling errors could be observed on all chromosomal arms for the CHM13 sample  
88 **(Supplementary Figure 1b,c)**, and were thus not restricted to a single chromosomal arm. The  
89 examination of each telomeric long-read also indicates that these error repeats frequently co-  
90 occur with telomeric repeats at the ends of each read **(Figure 1c, Supplementary Figure 3)**.

91 Together, our results suggest that telomeric regions are frequently misrepresented as other  
92 types of repeats in a strand-specific manner during Nanopore sequencing.

93  
94 We then assessed if these errors are broadly observed in other studies or are specific to the  
95 CHM13 dataset from the Telomere-to-Telomere consortium. To assess this, we examined the  
96 previously published NA12878 and HG002 Nanopore genome sequencing datasets [12,13,16].  
97 Remarkably, the same basecalling errors, TTAGGG→TTAAAA, CCCTAA→CTTCTT, and  
98 CCCTAA→CCCTGG, were similarly observed at telomeres in these datasets (**Figure 1d**,  
99 **Supplementary Figure 4a**), suggesting that these basecalling errors at telomeres are broadly  
100 observed across multiple studies. Remarkably, between 40-60% of reads at telomeric regions in  
101 these three datasets display at least one of these type of basecalling repeat artefacts for the  
102 Nanopore sequencing platform (**Supplementary Figure 4b**), while these errors were not  
103 observed in the PacBio HiFi datasets for the same samples (**Supplementary Figure 4b**).  
104 Further, we also partitioned these datasets based on the sequencing platforms used to generate  
105 them, and noted that basecalling error repeats are observed across all three nanopore  
106 sequencing platforms (MinION, GridION, PromethION) (**Figure 1d**, **Supplementary Figure 4a**).  
107 Together, these results show that these error repeats extend across nanopore sequencing  
108 datasets and sequencing platforms.

109  
110 We then questioned if these error repeats are unique to specific nanopore basecallers or  
111 basecalling models. We extracted reads from chromosomal ends, and re-basecalled ionic  
112 current data of these reads using different basecallers and basecalling models. Using the  
113 production-ready basecaller Guppy5 (Oxford Nanopore Technologies), and the developmental-  
114 phase basecaller Bonito (Oxford Nanopore Technologies), we noticed that these basecalling  
115 error repeats can be readily observed across both basecallers (**Figure 1e**, **Supplementary**  
116 **Figure 5 and 6**). Further, these error repeats were also observed when different basecalling  
117 models were applied (**Figure 1e**). Significantly, we also observed that the “fast” basecalling  
118 mode in Guppy led to almost complete loss of the (CCCTAA)<sub>n</sub> strand (**Figure 1e**,  
119 **Supplementary Figure 5a**), while the “HAC” basecalling model enabled both strands to be  
120 recovered, highlighting that the basecalling model applied can affect strand-specific recovery of  
121 telomeric reads. Together, these results suggest that error repeats are observable across  
122 nanopore basecallers, and basecalling models.

123  
124 To determine the cause for these repeat-calling errors, we then examined the ionic current  
125 profiles of these repeats. We thus generated ionic current profiles of these telomeric repeats  
126 and these error repeats, induced by the nanopore basecallers, using known mean current  
127 values of different 6-mers (**Methods**). Remarkably, we observed a high degree of similarity  
128 between current profiles between telomeric repeats and these basecalling errors (**Figure 1f**).  
129 Specifically, we observed that (TTAGGG)<sub>n</sub> telomeric repeats had a high degree of similarity with  
130 the (TTAAAA)<sub>n</sub> error repeats generated by the Bonito base-caller (Pearson correlation = 0.9928,  
131 Euclidean distance=4.9934) (**Supplementary Figure 7a-c**). Similarly, (CCCTAA)<sub>n</sub> current  
132 profile also showed high similarity with (CCCTGG)<sub>n</sub> repeats (Pearson correlation = 0.9783,  
133 Euclidean distance = 4.687), and reasonably good similarity with (CTTCTT)<sub>n</sub> repeats (Pearson  
134 correlation = 0.6411, Euclidean distance = 19.384) (**Supplementary Figure 7a-c**). Together,  
135 these results suggest that similarities in current profiles between repeat sequences are possible  
136 causes for repeat-calling errors at telomeric repeats.

137  
138 We then examined if repeat-calling errors may extend to other repetitive sequences beyond  
139 telomeric sequences. To address this, we search for other repeat pairs with similar current  
140 profiles that may be susceptible to these repeat-calling errors. We simulated and performed  
141 pairwise comparison of current profiles for all 6-mer repeats (n=8,386,560 comparisons)

142 **(Methods)**. Using similar Pearson correlation ( $\geq 0.99$ ) and Euclidean distance cutoffs ( $\leq 5$ ) as  
143 observed for telomeric repeat errors identified in this study (**Supplementary Figure 7a-c**), we  
144 identified a further 2577 pairs of repeats with similar current profiles (**Supplementary Table 1**,  
145 **Supplementary Figure 7d**). For instance, we found that  $(TTAGGG)_n$  telomeric repeats also  
146 showed high similarities in current profiles with repeats with single-nucleotide substitutions like  
147  $(TTAAGG)_n$ ,  $(TTAGAG)_n$  and  $(TTGGGG)_n$  (**Supplementary Figure 7d,e**). Repeat sequences  
148 like  $(GCTGCT)_n$  and  $(AACGGC)_n$  that differed drastically at the sequence level, but shared  
149 similar current profiles were also observed (**Supplementary Figure 7d,f**). Further, we also  
150 examined the unmappable pool of CHM13 nanopore reads after mapping it to the CHM13  
151 reference assembly. Remarkably, a significant pool of reads with long  $(GT)_n$  repeats were  
152 readily observed (**Supplementary Figure 8**). Interestingly,  $(GTGTGT)_n$  repeats were also found  
153 to have high similarities in current profiles with  $(CTCTCT)_n$  repeats (**Supplementary Figure 7d**,  
154 **Supplementary Table 1**), suggesting that the pool of unmappable  $(GT)_n$  reads may include  
155  $(CT)_n$  repeats. Collectively, our results suggests that these basecalling error repeats may be  
156 observed at other repetitive regions, beyond telomeres.

157  
158 To resolve these basecalling errors at telomeres, we then attempted to tune the nanopore  
159 basecaller by providing it with more training examples of telomeres (**Figure 2a**). Notably, model  
160 training was performed with a low learning rate to ensure that the majority of the model does not  
161 get affected during training while ensuring that minor adjustments in the model can be made to  
162 accurately basecall telomeres. Specifically, we tuned the deep neural network model underlying  
163 the Bonito basecaller by training it at a low learning rate with ground truth telomeric sequences  
164 extracted from the CHM13 reference genome, and current data of the corresponding reads  
165 (**Methods**). As two Nanopore PromethION runs were performed on the CHM13 dataset, we  
166 used the data from one run for training (run225) and tuning of the basecaller, and held out the  
167 data from the second run (run 226) for evaluation of our tuned basecaller. With this approach,  
168 we see a significant improvement in the base-calls of both the telomeres, and sub-telomeric  
169 regions on the training data and held out dataset with clearly observable decrease in errors on  
170 the chromosomal ends (**Figure 2b, Supplementary Figure 9a-d**). Together, our results indicate  
171 that a nanopore base-caller can be tuned to more accurately base-call telomeric regions by  
172 providing additional training examples.

173  
174 As it is computationally more efficient to redo repeat-calling only for the small fraction of  
175 problematic telomeric reads rather than all reads, we developed an overall strategy to select  
176 these telomeric reads for re-basecalling with the tuned Bonito+telomeres basecaller (**Figure 2c**).  
177 To select telomeric reads for selective re-basecalling, we relied on an observation from the  
178 CHM13 reference genome and nanopore sequencing datasets. Specifically, we noticed that  
179 telomeric reads which maps to the ends of the CHM13 reference genome tend to show a high  
180 frequency of telomeric, or basecalling error repeats as compared to the rest of the genome  
181 (**Supplementary Figure 10**). We therefore utilized this observation to separate the non-  
182 telomeric reads, from the candidate telomeric reads (**Figure 2c, Methods**). These telomeric  
183 reads were then re-base-called with the tuned Bonito basecaller before being recombined with  
184 the pool of non-telomeric reads. Remarkably, with this strategy, we observed a significant  
185 improvement in recovery of telomeric reads with  $(TTAGGG)_n$  and  $(CCCTAA)_n$  repeats (from 384  
186 to 476  $TTAGGG$  and 373 to 686  $CCCTAA$  reads) (**Figure 2d**). At the same time, a sharp  
187 reduction of these basecalling repeat errors was also observed (151 to 17  $TTAAAA$  reads, 561  
188 to 48  $CTTCTT$  reads, and 337 to 20  $CCCTGG$  reads) (**Figure 2d**). Together, these results  
189 suggests that our “selective tuning” approach for fixing basecalling errors at telomeres can  
190 improve recovery of telomeric reads while reducing telomeric basecalling repeat artefacts.

191

192 We further evaluated our approach for possible impact on overall basecalling accuracy. While a  
193 reduction in global basecalling accuracy was observed (~1-2%) when our tuned basecaller was  
194 directly applied to the full dataset, caused likely by miscalling of endogenous (CTTCTT)<sub>n</sub>  
195 genomic repeats as (CCCTAA)<sub>n</sub>, this loss of global basecalling accuracy could be avoided by  
196 applying our basecaller to telomeric reads alone. Concordant with this, we did not observe  
197 changes in overall basecalling accuracy with our telomere-selective tuning approach (**Figure**  
198 **2e**). These results indicate that our telomere-selective tuning approach has negligible impact on  
199 basecalling accuracy for the rest of the genome.

200

201

## 202 **Conclusion**

203

204 In this study, we showed that basecalling errors can be widely observed at telomeric regions  
205 across nanopore datasets, sequencing platforms, basecallers, and basecalling models. We  
206 further showed that these strand-specific basecalling errors were likely induced by similarities in  
207 current profiles between different repeat types. To resolve these basecalling errors at telomeres,  
208 we devised an overall strategy to re-basecall telomeric reads using a tuned nanopore basecaller.  
209 More broadly, our study highlights the importance of verifying nanopore basecalls in long,  
210 repetitive and poorly defined regions of the genome. For instance, this can be done either with  
211 an orthogonal platform, or at a minimum by ensuring nanopore basecalls between opposite  
212 strands are concordant. In the future, we anticipate that further improvements in the nanopore  
213 basecaller or basecalling model as demonstrated in this study will potentially lead to the  
214 reduction or elimination of these basecalling artefacts.

215

216

## 217 **Methods**

218

### 219 ***Nanopore and PacBio Datasets***

220 Nanopore and PacBio HiFi datasets for the CHM13 sample were downloaded directly from the  
221 telomere-to-telomere consortium (<https://github.com/marbl/CHM13>)

222

223 Nanopore dataset for GM12878 was obtained from the Nanopore WGS consortium  
224 (<https://github.com/nanopore-wgs-consortium/NA12878/blob/master/Genome.md>). PacBio HiFi  
225 dataset for GM12878 was obtained from the repository at the SRA database (SRP194450), and  
226 downloaded from the following link  
227 (<https://www.ebi.ac.uk/ena/browser/view/SRR9001768?show=reads>)

228

229 The HG002 PacBio HiFi and Nanopore datasets were downloaded from the Human  
230 Pangenome Reference Consortium ([https://github.com/human-pangenomics/HG002\\_Data\\_Freeze\\_v1.0](https://github.com/human-pangenomics/HG002_Data_Freeze_v1.0)). Specifically, the HG002 Data Freeze (v1.0)  
231 recommended downsampled data mix was downloaded. The PacBio HiFi dataset corresponds  
232 to ~34X coverage of Sequel II System with Chemistry 2.0. The Nanopore dataset corresponds  
233 to 60x coverage of unsheared sequencing from 3 PromethION flow cells from Shafin et al [17].

234

### 235 ***Extraction of candidate telomeric reads***

236 Telomeric reads were extracted by mapping all reads to the CHM13 draft genome assembly  
237 (v1.0) obtained from the telomere-to-telomere consortium using Minimap2 (version 2.17-r941).  
238 Subsequent to that, reads that mapped to within 10 kilobasepairs of the start and end of each  
239 autosome and X-chromosome were then extracted using SAMtools (version 1.10).

240

### 241 ***Co-occurrence matrix***

242 Candidate PacBio HiFi and Nanopore telomeric reads were first extracted as described above,  
243 and then converted into the FASTA format using SAMtools (version 1.10). Subsequent to that,  
244 custom Python scripts were used to assess if each of the reads contain at least four consecutive  
245 counts of the repeat sequence of interest (e.g. (TTAGGG)<sub>4</sub>). This information is then used to  
246 generate a pair-wise correlation matrix as depicted with R in the main text.

247

### 248 ***Basecalling of nanopore data with different basecallers and basecalling models***

249 Basecalling of Nanopore data was done using Guppy (Version 4.4.2), Guppy (Version 5.0.16)  
250 and Bonito v0.3.5 (commit d8ae5eeb834d4fa05b441dc8f034ee04cb704c69). For Guppy4, four  
251 different basecalling models were applied (guppy\_dna\_r9.4.1\_450bps\_fast,  
252 guppy\_dna\_r9.4.1\_450bps\_hac, guppy\_dna\_r9.4.1\_450bps\_prom\_fast,  
253 guppy\_dna\_r9.4.1\_450bps\_prom\_hac). For Guppy 5, six different basecalling models were  
254 applied (dna\_r9.4.1\_450bps\_fast, dna\_r9.4.1\_450bps\_hac, dna\_r9.4.1\_450bps\_sup,  
255 dna\_r9.4.1\_450bps\_fast\_prom, dna\_r9.4.1\_450bps\_hac\_prom, dna\_r9.4.1\_450bps\_sup\_prom)  
256 For Bonito, the v1, v2, v3, v3.1 and default basecalling models were applied.

257

### 258 ***Current profiles for different repeat sequences***

259 The mean current level for different k-mers sequenced by Nanopore sequencing was obtained  
260 from the k-mer models published by Oxford Nanopore  
261 ([https://github.com/nanoporetech/kmer\\_models/tree/master/r9.4\\_180mv\\_450bps\\_6mer](https://github.com/nanoporetech/kmer_models/tree/master/r9.4_180mv_450bps_6mer)).

262 Circular permutations of each 6-mer of interest was generated, and their corresponding mean  
263 current level extracted from the k-mer models. The current profiles for each of the indicated  
264 repeat sequences were then plotted and depicted in the figure.

265

266

267

268 ***Pairwise comparison of all possible k-mers***

269 Current profile for each 6-mer repeat sequence was generated using the published k-mer  
270 models as described above. Pairwise comparisons of all possible 6-mer repeat current profiles  
271 was then performed (8,386,560 pairs in total). A corresponding (i) Pearson correlation value, (ii)  
272 mean-centered Euclidean distance, and (iii) mean current difference for each pair of 6-mer  
273 repeat current profiles were then generated. Pairs of repeats with a Pearson correlation value  $\geq$   
274 0.99 and Euclidean distance  $\leq 5$  were selected as putative repeat pairs that can be miscalled.

275  
276 ***Tuning of bonito model***

277 The default model from Bonito v0.3.5 (commit d8ae5eeb834d4fa05b441dc8f034ee04cb704c69)  
278 was used as the base model for model tuning. The training dataset needed for the training  
279 process was generated from the telomeric reads from a PromethION run in the CHM13 dataset  
280 (run225). More broadly, we then generate the training dataset by matching the current profiles  
281 from the Nanopore run to ground truth sequences that we extracted from the CHM13 draft  
282 reference genome assembly (v1.0) using custom written code.

283  
284 Specifically, these telomeric reads were first basecalled using the initial Bonito basecalling  
285 model, and then mapped back to the CHM13 draft reference genome assembly (v1.0). This  
286 allowed each telomeric read to be properly assigned to its corresponding chromosomal arm with  
287 its sub-telomeric sequence. Nonetheless, as the telomeric region of the same read could not be  
288 properly mapped to the telomeric repeats due to the repeat errors, there was difficulty in  
289 assigning the nanopore current data to the correct ground truth sequences in the reference  
290 genome. As such, the presume length of sequences to extract was estimated using the  
291 basecalling repeat error sequences, and the same length of sequences were then extracted  
292 from the CHM13 reference genome to serve as ground truth sequences. With this idea and with  
293 custom Perl script, we were able to generate a set of ground truth sequences and signals for  
294 model tuning. These data were then formatted into the corresponding python objects required  
295 by the Bonito basecaller with custom Python scripts. Using the tune function in Bonito and with  
296 our prepared training dataset, we were then able to train the basecaller to convergence.

297  
298 ***Selective application of tuned basecaller to telomeric reads***

299 We applied our tuned basecaller by first extracting candidate telomeric reads for re-basecalling.  
300 This was done by enumerating the total 3-mer telomeric (TTAGGG, CCCTAA) and repeat  
301 artefact count (TTAAAA, CTTCTT, CCCTGG) on each read. Reads with at least 10 total counts  
302 of these repeats were isolated and their readnames noted. These reads were then excluded  
303 from the total pool of reads via their readnames, and basecalled separately using our tuned  
304 basecaller using the fast5 data of these reads. Following basecalling with the tuned basecaller,  
305 these reads were then recombined with the main pool of reads.

306  
307  
308  
309 **Abbreviations**

310 PacBio: Pacific Biosciences  
311 SMRT: Single Molecule Real Time

312  
313

314 **Author information**

315

316 ***Affiliations***

317 **Department of Medical Oncology, Dana-Farber Cancer Institute, Boston, MA, USA**

318 Kar-Tong Tan, Michael K. Slevin, Matthew Meyerson

319

320 **Cancer Program, Broad Institute of MIT and Harvard, Cambridge, MA, USA**

321 Kar-Tong Tan, Matthew Meyerson

322

323 **Department of Genetics, Harvard Medical School, Boston, MA, USA**

324 Kar-Tong Tan, Matthew Meyerson

325

326 **Center for Cancer Genomics, Dana-Farber Cancer Institute, Boston, MA, USA**

327 Michael K. Slevin, Matthew Meyerson

328

329 **Department of Data Sciences, Dana-Farber Cancer Institute, Boston, MA, USA**

330 Heng Li

331

332 **Department of Biomedical Informatics, Harvard Medical School, Boston, MA, USA**

333 Heng Li

334

335

336 ***Author contributions***

337 K.T.T. and M.S. identified issues with Nanopore sequencing of telomeres, and discovered  
338 basecalling errors at telomeric regions. K.T.T. evaluated basecalling errors in Nanopore  
339 sequencing datasets, and designed the overall approach for correcting basecalling errors at  
340 telomeric regions with inputs from H.L. and M.M. K.T.T. wrote the initial draft of the manuscript  
341 with inputs from H.L. and M.M. M.M. and H.L. jointly supervised the work. All authors read,  
342 revised, and approved the submission of the manuscript.

343

344

345 ***Corresponding authors***

346 Correspondence to Matthew Meyerson ([matthew\\_meyerson@dfci.harvard.edu](mailto:matthew_meyerson@dfci.harvard.edu)) or Heng Li  
347 ([hli@jimmy.harvard.edu](mailto:hli@jimmy.harvard.edu)).



348 **Declarations**

349

350 ***Ethics approval and consent to participate***

351 Not applicable.

352

353 ***Consent for publication***

354 Not applicable.

355

356 ***Availability of data and materials***

357 Source code to apply and retrain the bonito basecalling model for telomeric region can be found  
358 at the following link: [https://github.com/ktan8/nanopore\\_telomere\\_basecall/](https://github.com/ktan8/nanopore_telomere_basecall/).

359

360 The tuned bonito basecalling model can be downloaded from

361 [https://zenodo.org/api/files/86cb9586-300f-493d-b9c4-](https://zenodo.org/api/files/86cb9586-300f-493d-b9c4-0ab2f2848e3c/chm13_nanopore_trained_run225.zip)

362 [0ab2f2848e3c/chm13\\_nanopore\\_trained\\_run225.zip](https://zenodo.org/api/files/86cb9586-300f-493d-b9c4-0ab2f2848e3c/chm13_nanopore_trained_run225.zip). A comprehensive version of

363 Supplementary Table 1 with all possible pairs of k-mers can be found at

364 [https://zenodo.org/api/files/86cb9586-300f-493d-b9c4-](https://zenodo.org/api/files/86cb9586-300f-493d-b9c4-0ab2f2848e3c/all_comparisions.similar_profile.txt.zip)

365 [0ab2f2848e3c/all\\_comparisions.similar\\_profile.txt.zip](https://zenodo.org/api/files/86cb9586-300f-493d-b9c4-0ab2f2848e3c/all_comparisions.similar_profile.txt.zip).

366

367

368 ***Competing interests***

369 H.L. is a consultant of Integrated DNA Technologies and on the SAB of Sentieon, Innozeen and  
370 BGI. M.M. has a patent for *EGFR* mutations for lung cancer diagnosis issued, licensed, and with  
371 royalties paid from LabCorp and a patent for EGFR inhibitors pending to Bayer; and was a  
372 founding advisor of, consultant to, and equity holder in Foundation Medicine, shares of which  
373 were sold to Roche.

374

375 ***Funding***

376 K.T.T. is supported by a PhRMA Foundation Informatics Fellowship, and a NUS Development  
377 Grant from the National University of Singapore. M.M. is supported by an American Cancer  
378 Society Research Professorship. This work was supported by grants from the National Human  
379 Genome Research Institute (NHGRI) (Grant Nos. R01 HG010040, U01 HG010961, and U41  
380 HG010972 to H.L.), and the National Cancer Institute (Grant No. R35 CA197568 to M.M.).

381

382 ***Acknowledgements***

383 We would like to thank all members of the H.L. and M.M. labs for helpful comments and  
384 discussions. We would also like to thank the Telomere-to-Telomere consortium for generating  
385 the CHM13 datasets used in this study.

386

387

388

389

390 **References**

- 391 1. Shay JW, Wright WE. Telomeres and telomerase: three decades of progress. *Nat Rev Genet.*  
392 2019;
- 393 2. Turner K, Vasu V, Griffin D. Telomere Biology and Human Phenotype. *Cells.* 2019;
- 394 3. Li Y, Tergaonkar V. Noncanonical functions of telomerase: Implications in telomerase-  
395 targeted cancer therapies. *Cancer Res.* 2014.
- 396 4. Kim NW, Piatyszek MA, Prowse KR, Harley CB, West MD, Ho PLC, et al. Specific  
397 association of human telomerase activity with immortal cells and cancer. *Science (80- ).* 1994;
- 398 5. Meyerson M, Counter CM, Eaton EN, Ellisen LW, Steiner P, Caddle SD, et al. hEST2, the  
399 putative human telomerase catalytic subunit gene, is up- regulated in tumor cells and during  
400 immortalization. *Cell.* 1997;
- 401 6. Kolquist KA, Ellisen LW, Counter CM, Meyerson M, Tan LK, Weinberg RA, et al. Expression  
402 of TERT in early premalignant lesions and a subset of cells in normal tissues. *Nat Genet.* 1998;
- 403 7. Li Y, Tergaonkar V. Telomerase reactivation in cancers: Mechanisms that govern  
404 transcriptional activation of the wild-type vs. mutant TERT promoters. *Transcription.* 2016.
- 405 8. Yuan X, Larsson C, Xu D. Mechanisms underlying the activation of TERT transcription and  
406 telomerase activity in human cancer: old actors and new players. *Oncogene.* 2019.
- 407 9. Shay JW. Telomeres and aging. *Curr. Opin. Cell Biol.* 2018.
- 408 10. Aubert G, Lansdorp PM. Telomeres and aging. *Physiol. Rev.* 2008.
- 409 11. Shamas MA. Telomeres, lifestyle, cancer, and aging. *Curr Opin Clin Nutr Metab Care.*  
410 2011;
- 411 12. Wenger AM, Peluso P, Rowell WJ, Chang PC, Hall RJ, Concepcion GT, et al. Accurate  
412 circular consensus long-read sequencing improves variant detection and assembly of a human  
413 genome. *Nat Biotechnol.* 2019;
- 414 13. Jain M, Koren S, Miga KH, Quick J, Rand AC, Sasani TA, et al. Nanopore sequencing and  
415 assembly of a human genome with ultra-long reads. *Nat Biotechnol.* 2018;
- 416 14. Miga KH, Koren S, Rhie A, Vollger MR, Gershman A, Bzikadze A, et al. Telomere-to-  
417 telomere assembly of a complete human X chromosome. *bioRxiv.* 2019;
- 418 15. Logsdon GA, Vollger MR, Hsieh PH, Mao Y, Liskovych MA, Koren S, et al. The structure,  
419 function and evolution of a complete human chromosome 8. *Nature.* 2021;
- 420 16. Zook JM, Catoe D, McDaniel J, Vang L, Spies N, Sidow A, et al. Extensive sequencing of  
421 seven human genomes to characterize benchmark reference materials. *Sci Data.* 2016;
- 422 17. Shafin K, Pesout T, Lorig-Roach R, Haukness M, Olsen HE, Bosworth C, et al. Nanopore  
423 sequencing and the Shasta toolkit enable efficient de novo assembly of eleven human genomes.  
424 *Nat Biotechnol.* 2020;38.

425  
426  
427

## Figure 1

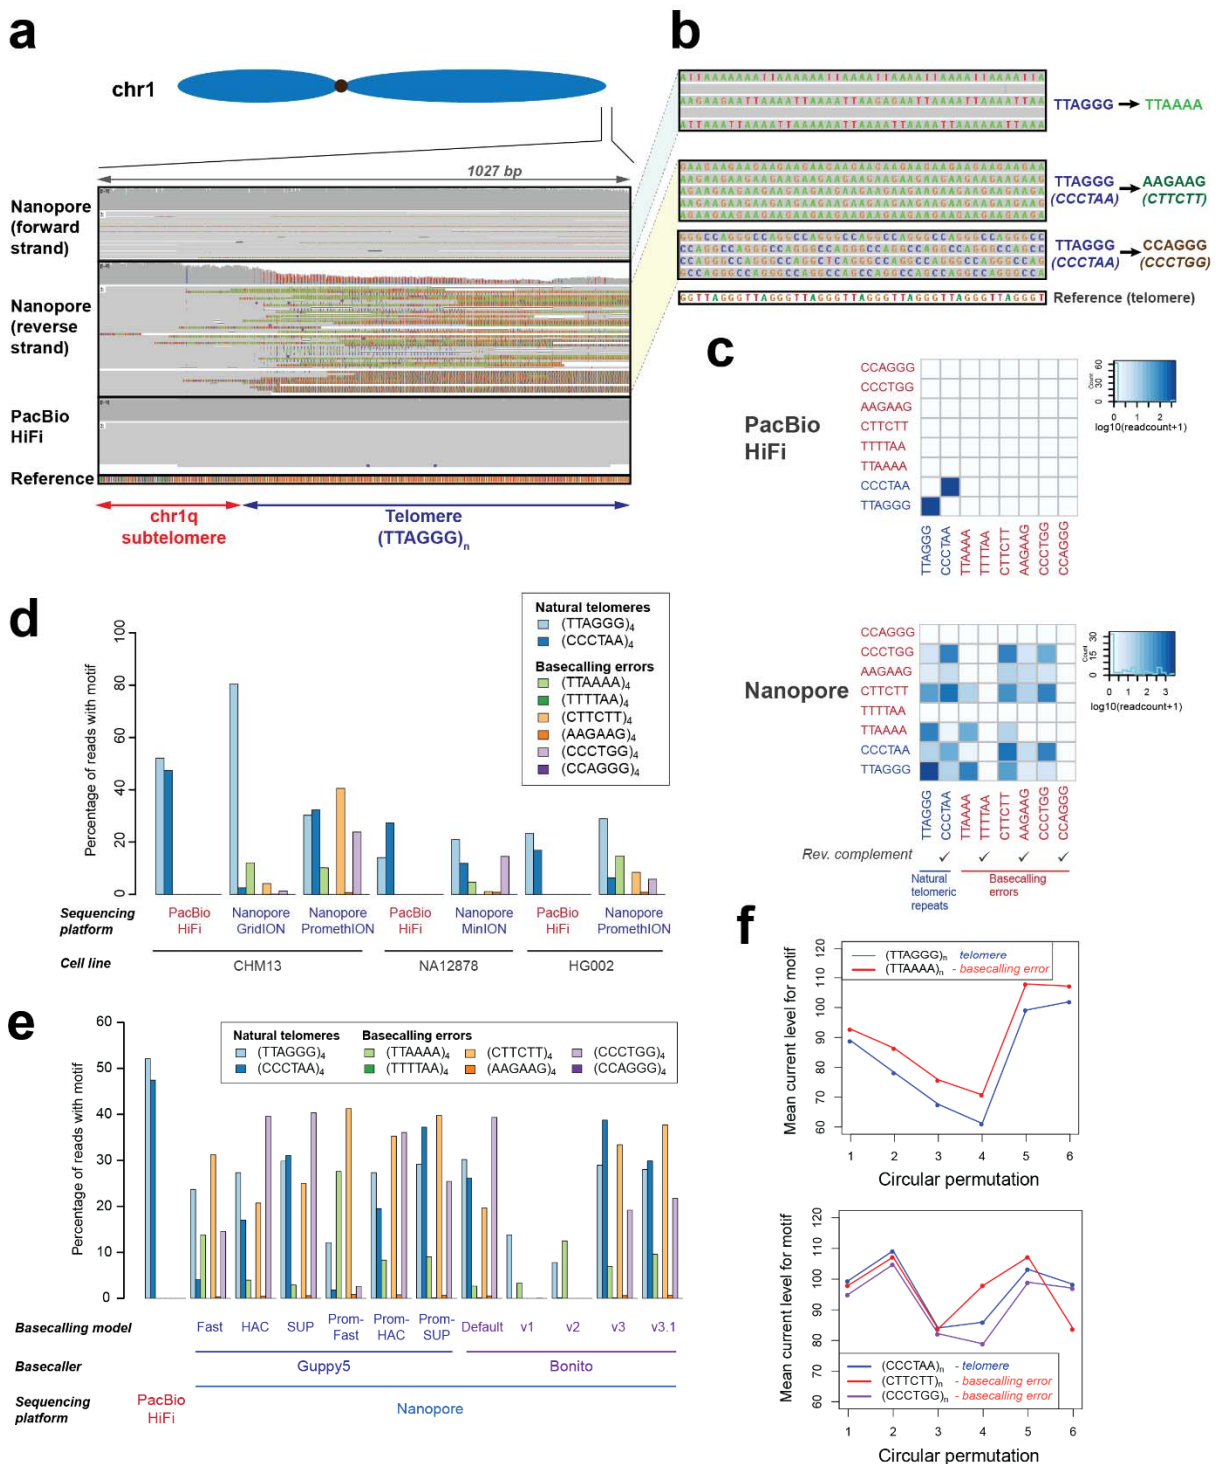

428  
 429 **Figure 1 Strand-specific Nanopore basecalling errors are pervasive at telomeres. (a,b)**  
 430 IGV screenshot illustrating the three types of basecalling errors found on the forward and  
 431 reverse strands of telomeres for Nanopore sequencing. (TTAGGG)<sub>n</sub> on the forward strand of  
 432 Nanopore sequencing data was basecalled as (TTAAAA)<sub>n</sub> while (CCCTAA)<sub>n</sub> on the reverse

433 strand was basecalled as  $(CTTCTT)_n$  and  $(CCCTGG)_n$ . PacBio HiFi data generated from the  
434 same cell line (CHM13) is depicted as a control. Reference genome indicated in the plot  
435 corresponds to the chm13 draft genome assembly (v1.0). **(c)** Co-occurrence heatmap  
436 illustrating the frequency of co-occurrence of repeats corresponding to natural telomeres, or to  
437 basecalling errors in PacBio HiFi and Nanopore long-reads found at chromosomal ends (within  
438 10kb of annotated end of the reference genome). Diagonal of co-occurrence matrix represents  
439 counts of long-reads with only a single type of repeats observed. **(d)** Basecalling errors at  
440 telomeres are observed across different nanopore datasets and sequencing platforms. **(e)**  
441 Basecalling errors at telomeres are observed different nanopore basecallers and basecalling  
442 models. Guppy5 and the Bonito basecallers, and different basecalling models for each basecaller,  
443 were used to basecall telomeric reads in the CHM13 PromethION dataset (reads that mapped  
444 to flanking 10kb regions of the CHM13 reference genome). **(f)** Basecalling errors share similar  
445 nanopore current profiles as telomeric repeats. Current profiles for telomeric and basecalling  
446 error repeats were plotted based on known mean current profiles for each k-mer (Methods).  
447  
448

## Figure 2

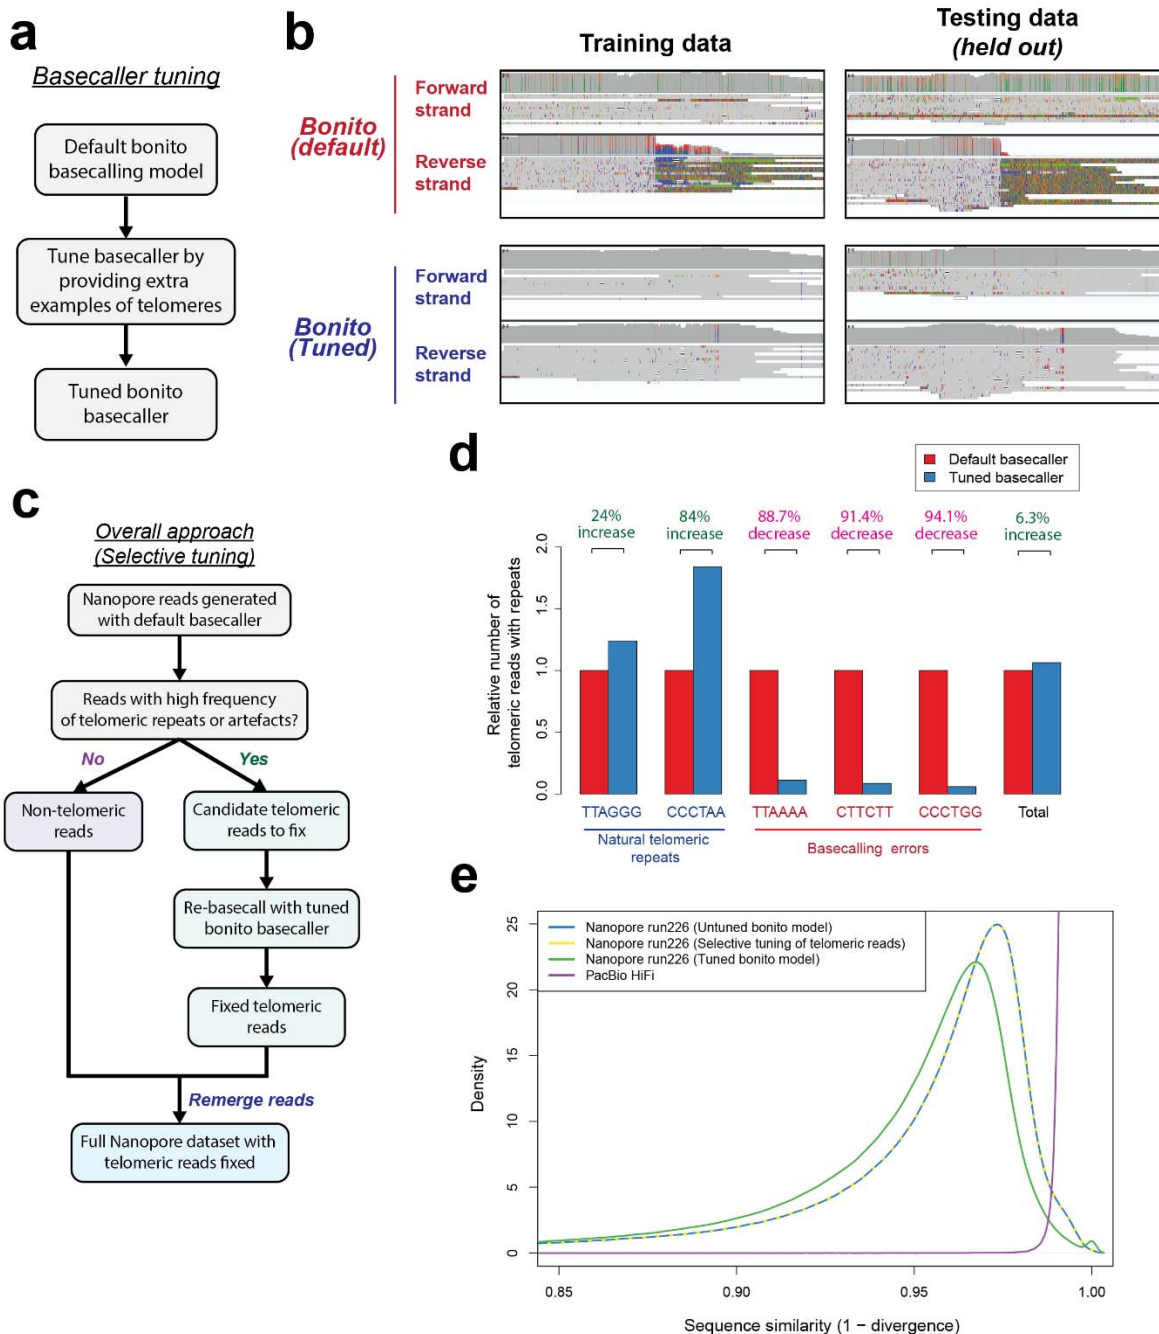

449  
 450 **Figure 2 Selective re-basecalling of telomeric reads resolves basecalling errors at**  
 451 **telomeres.** (a) Approach for tuning the bonito basecalling model for improving basecalls at  
 452 telomeres. (b) Tuned bonito basecalling model leads to improvement in basecalls at telomeric  
 453 regions. IGV screenshots of telomeric region (chr2q) in the CHM13 dataset basecalled using the  
 454 default bonito basecaller, and the tuned bonito basecalling model is as depicted. (c) Overall  
 455 approach for selecting and fixing telomeric reads in nanopore sequencing datasets. Telomeric  
 456 reads are selected (Methods), and rebasecalled using the tuned bonito basecalling model. (d)  
 457 The selective tuning approach leads to improved recovery of telomeric reads, and decrease in

458 the number of reads with basecalling artefacts. Evaluation was performed on the held out test  
459 dataset (run226). **(e)** The 'selective basecalling' approach leads to little detected negative  
460 impact on basecalling of other genomic regions. The sequence similarity of all reads to the  
461 reference genome for three approaches for basecalling of nanopore reads was evaluated. They  
462 are applying the default bonito basecalling model to all reads (untuned bonito model), applying  
463 the tuned bonito basecalling model to all reads (tuned bonito model), and applying the tuned  
464 bonito basecalling model selectively to telomeric reads only (selective tuning of telomeric reads).  
465 The density plot depicts the sequence similarity of each read against the CHM13 reference  
466 genome as assessed using minimap2.  
467

## Supplementary Figure 1

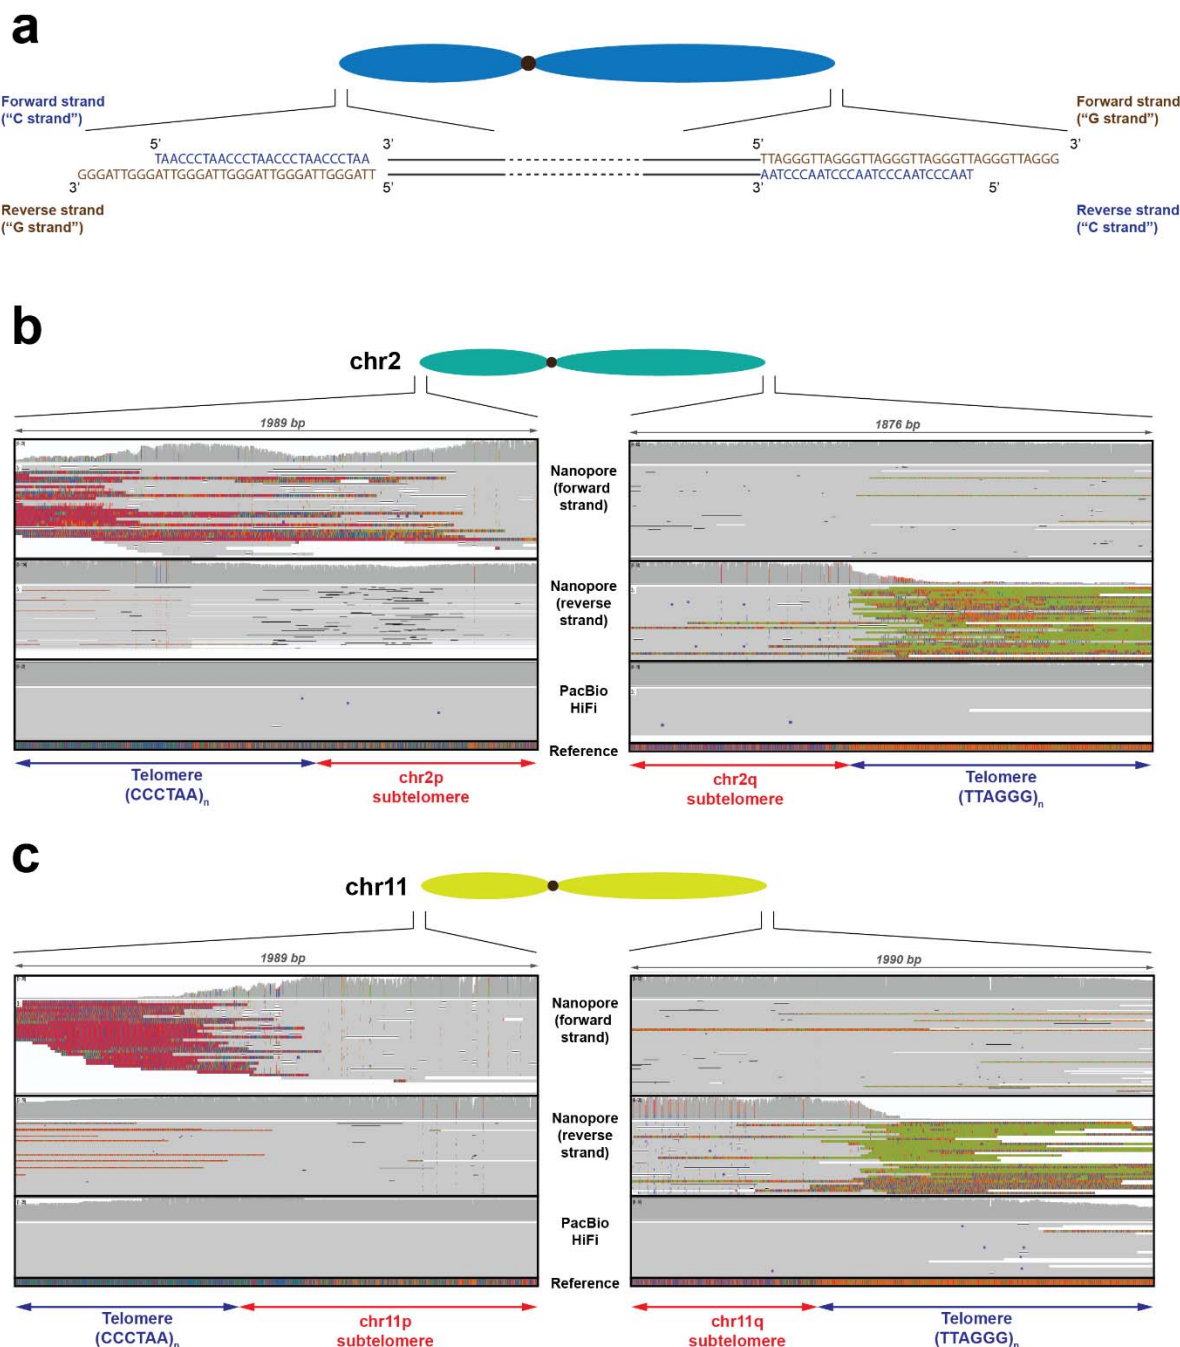

468  
 469  
 470  
 471  
 472  
 473  
 474  
 475  
 476

**Supplementary Figure 1 Additional screenshots of basecalling repeat errors found on different chromosomal arms. (a)** Schematic depicting sequence and orientation of telomeric repeat sequences on the p-arms (arm on the left in the schematic) and q-arms (arm on the right of the schematic) of a chromosome. Note that the forward strand for the arm on the left, and reverse strand for the arm on the right are "C-rich strands" and characterized by (CCCTAA)<sub>n</sub> repeats in a 5'-to-3' direction. Also note that the reverse strand for the arm on the left, and forward strand for the arm on the right are "G-rich strands" and characterized (TTAGGG)<sub>n</sub>

477 repeats in a 5'-to-3' direction. **(b-c)** Screenshots depicting additional representative examples of  
478 chromosomal arms with basecalling error repeats. These are **(b)** chromosome 2 and **(c)**  
479 chromosome 11. Screenshots were extracted from the Integrative Genomics Viewer for the  
480 CHM13 long-read dataset mapped against the CHM13 reference genome. Related to Figure 1a.  
481





488 (CCCTAA)<sub>n</sub> to (CCCTGG)<sub>n</sub>. Note that **(b)** and **(c)** represents the reverse complementary  
489 sequence of the actual nanopore long-read sequence. Also note that the repeats were found on  
490 the end of each read as expected given that telomeric repeats are typically found on the end of  
491 the chromosomes.  
492

## Supplementary Figure 3

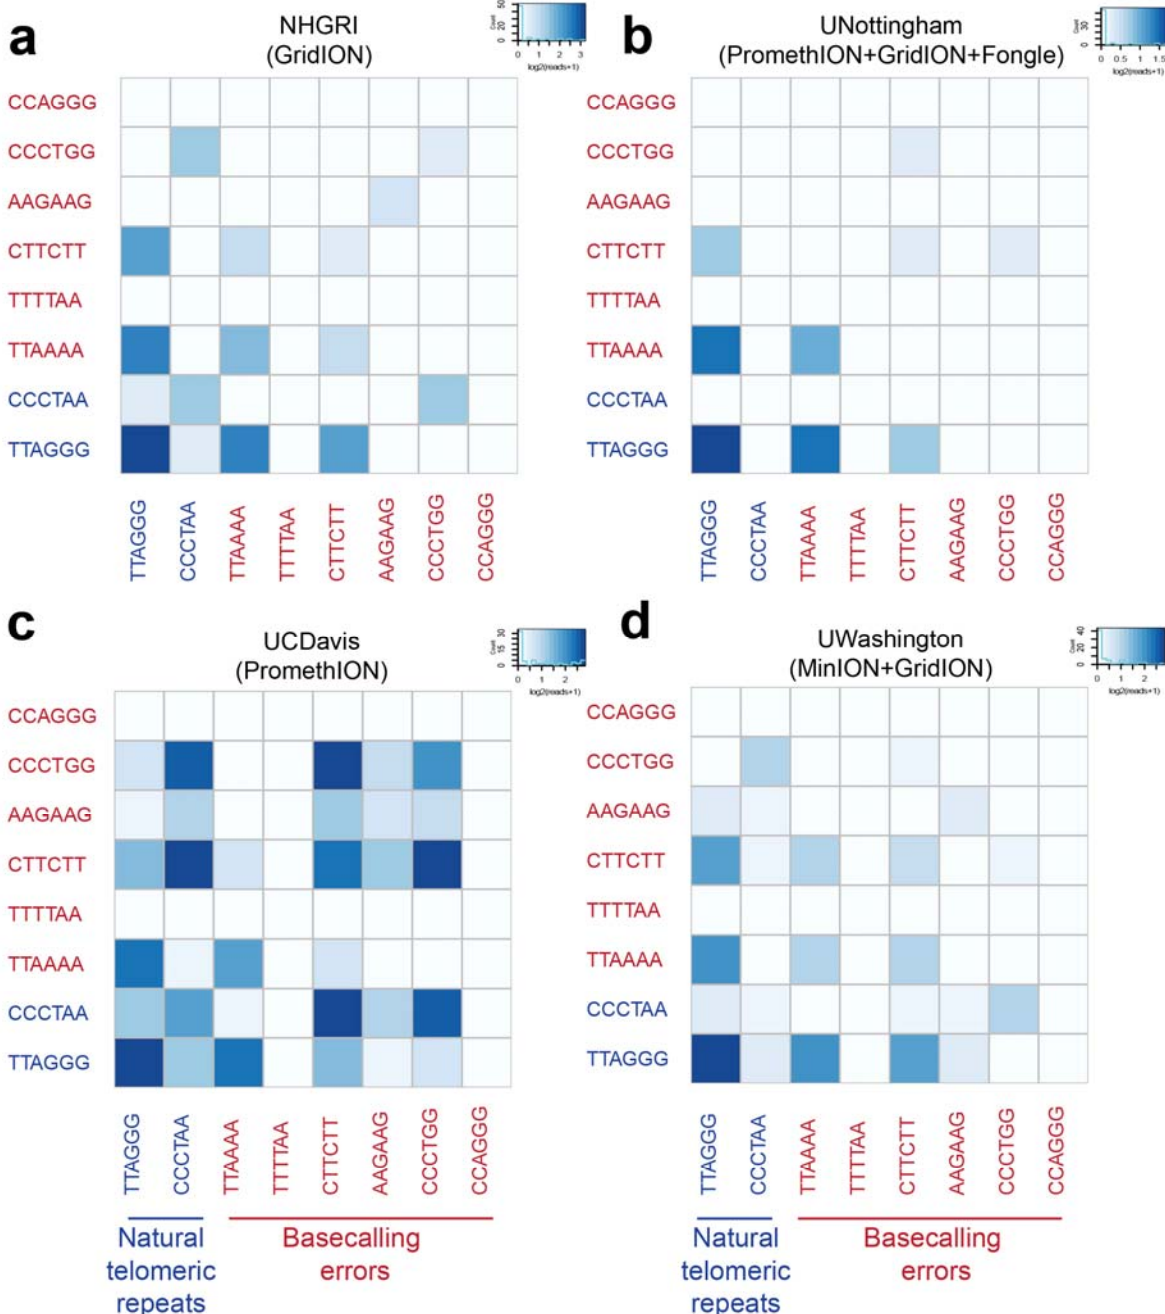

493  
 494 **Supplementary Figure 3 Co-occurrence heatmap illustrating the frequency of co-**  
 495 **occurrence of telomeric repeats and basecalling errors for the CHM13 Nanopore dataset**  
 496 **generated at different sites.** These are **(a)** National Human Genome Research Institute  
 497 **(NHGRI), (b)** University of Nottingham (UNottingham), **(c)** University of California, Davis  
 498 **(UCDavis) and (d)** University of Washington (UWashington). The sequencing platforms used for  
 499 sequencing at each of the sites are also as indicated. This figure is related to Figure 1b.  
 500

## Supplementary Figure 4

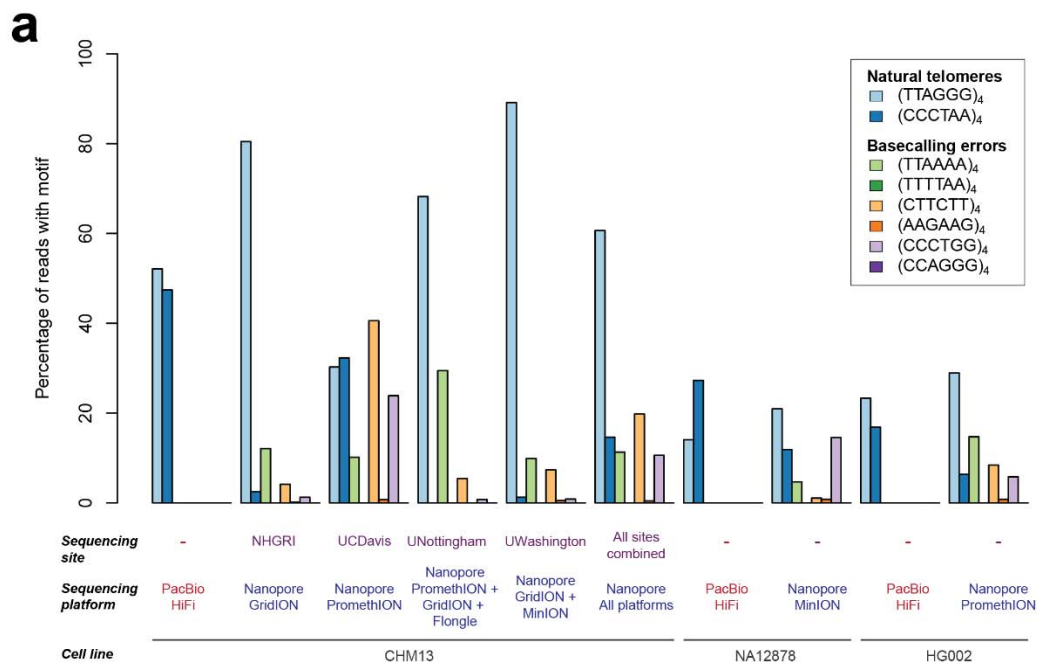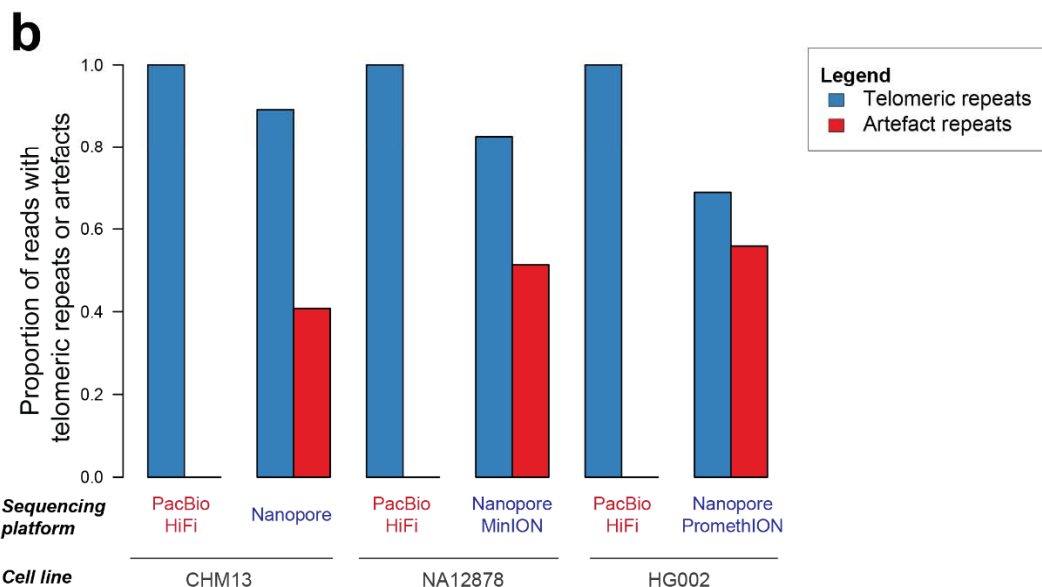

501  
 502 **Supplementary Figure 4 Frequency of telomeric repeat errors in different Nanopore**  
 503 **sequencing dataset and sequencing platforms. (a)** Frequency of basecalling error repeats  
 504 on three different cell lines generated by different Nanopore sequencing platforms. This figure  
 505 is an extension Figure 1d. **(b)** Aggregated fraction of basecalling error repeats for different cell  
 506 lines and datasets.

507  
 508  
 509

## Supplementary Figure 5

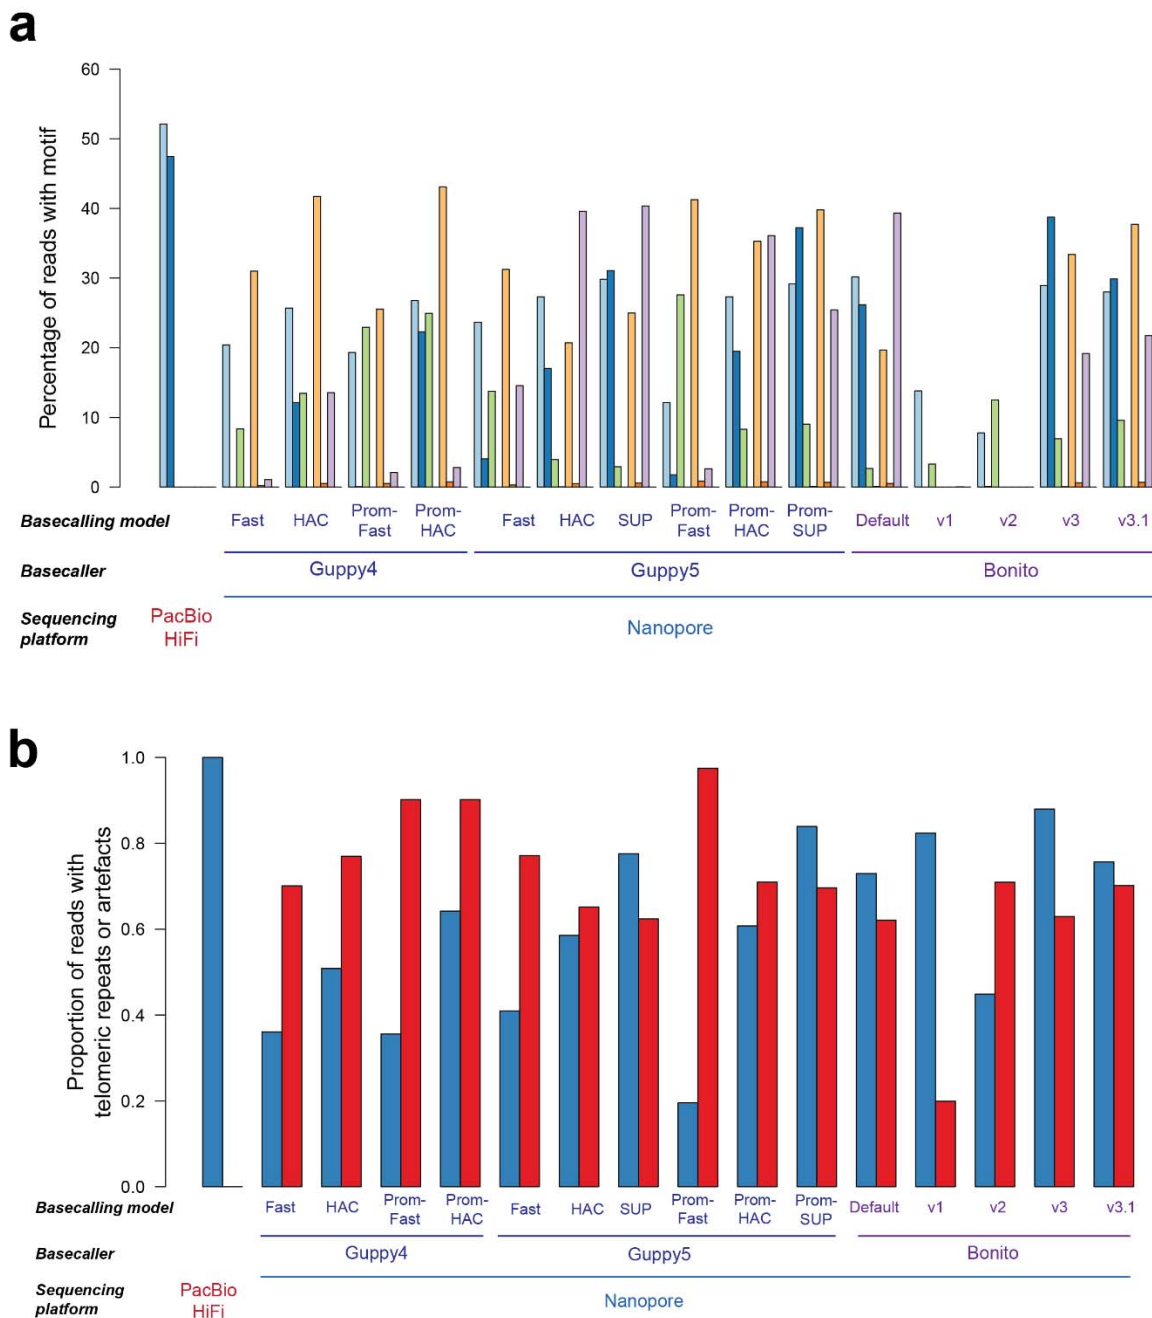

510  
 511 **Supplementary Figure 5 Frequency of telomeric repeat errors in different Nanopore**  
 512 **basecallers. (a)** Frequency of basecalling error repeats for different basecallers (Guppy4,  
 513 Guppy5 and Bonito) and basecalling models. This figure is an extension of Figure 1e. **(b)**  
 514 Aggregated fraction of basecalling error repeats for different basecallers and basecalling models.  
 515  
 516

## Supplementary Figure 6

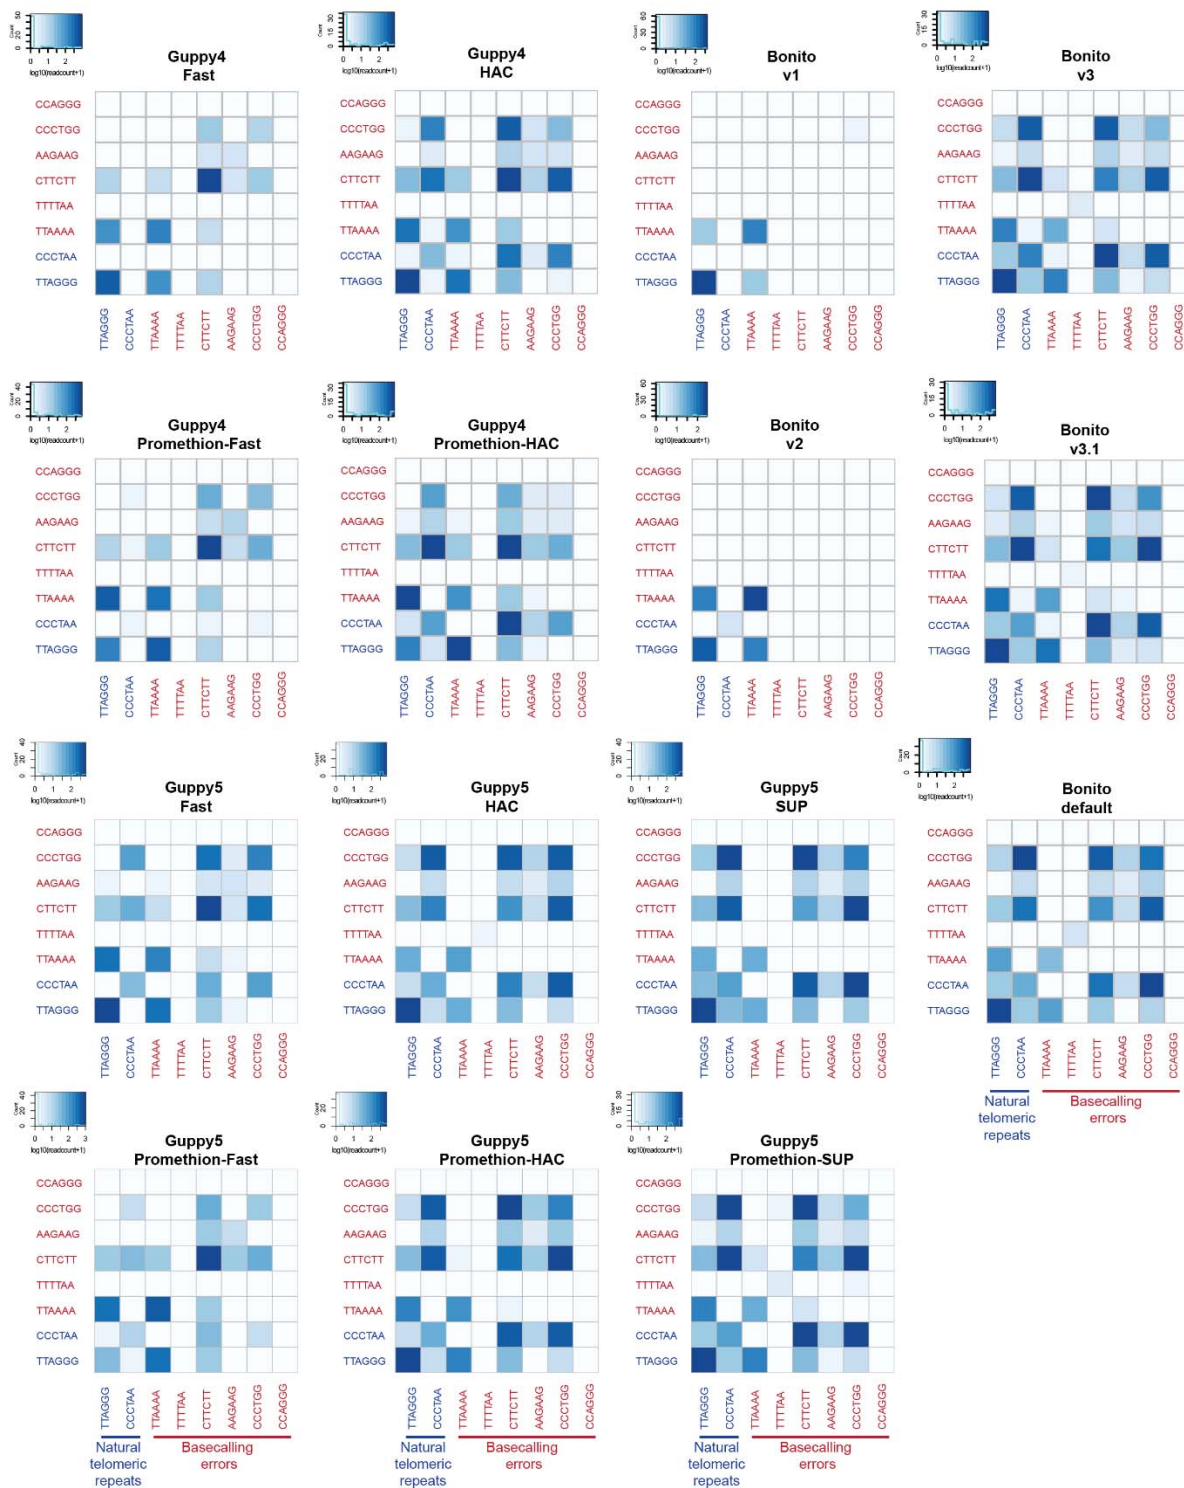

517  
518  
519  
520  
521

**Supplementary Figure 6 Co-occurrence heatmap for different Nanopore basecalling models.** Different nanopore basecallers and basecalling models were applied to the CHM13 Nanopore promethion datasets. The frequency of telomeric repeats and basecalling artefacts observed on reads obtained are as depicted.

## Supplementary Figure 7

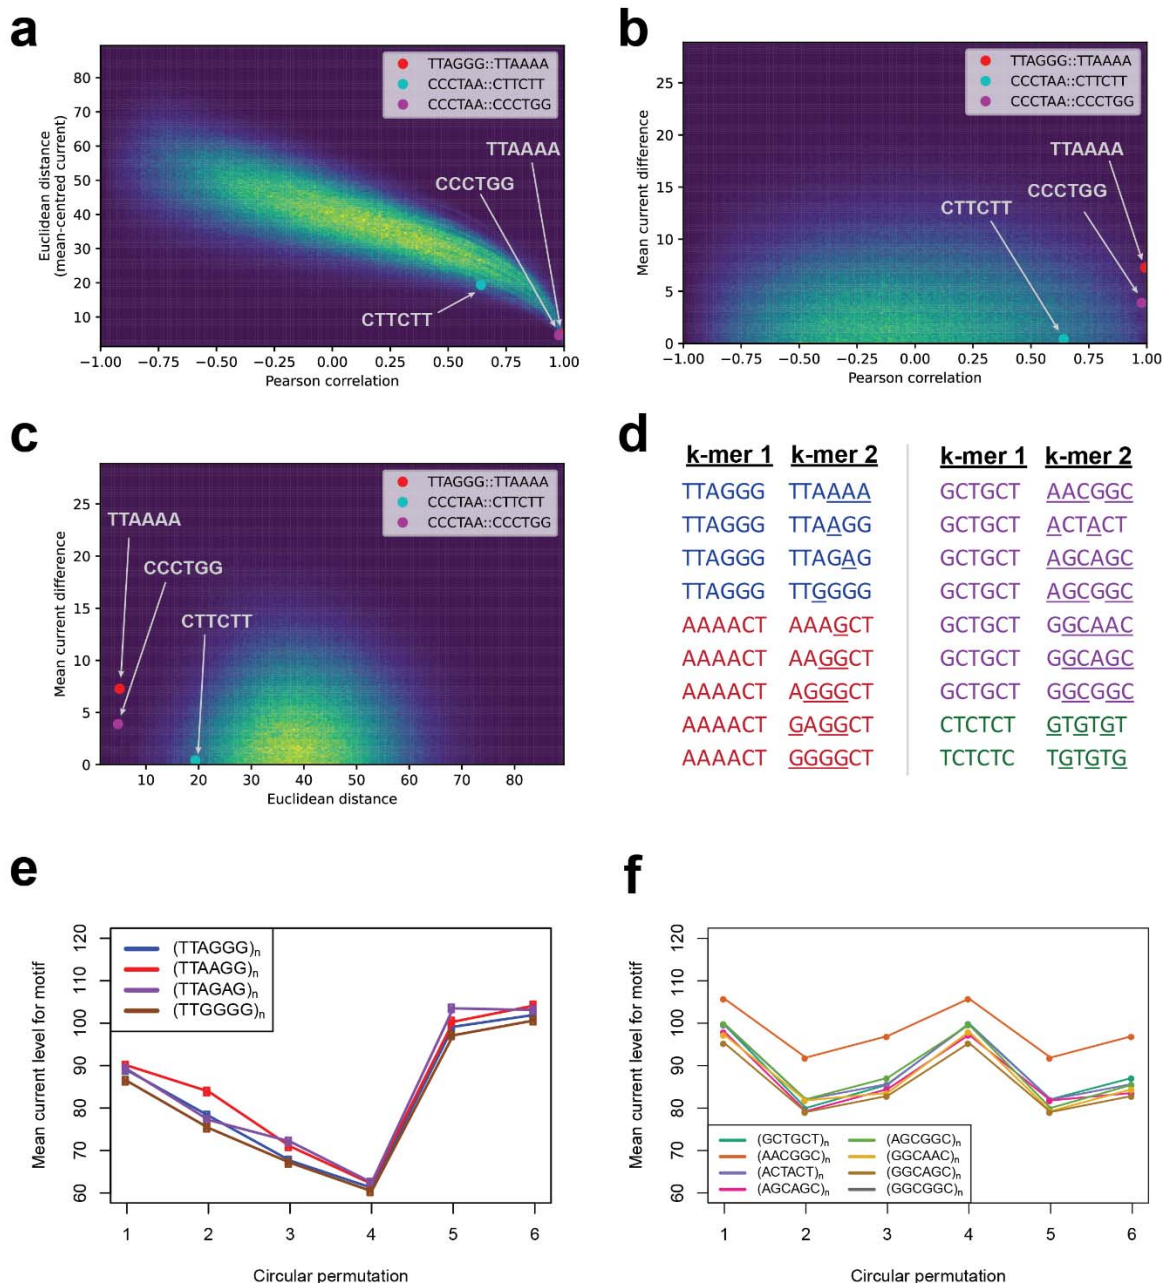

522  
523 **Supplementary Figure 7 Similarities between current profiles for all possible pairs of 6-**  
524 **mer repeats. (a-c)** Heatmaps depicting the Euclidean distances, Pearson correlation, and mean  
525 current differences between current profiles between all possible 6-mer repeat sequences.  
526 These are depicted as pairwise plots for **(a)** the Euclidean distances vs. the Pearson correlation,  
527 **(b)** the mean current difference vs. the Pearson correlation, and **(c)** the mean current difference  
528 vs. the Euclidean distance. The pairwise comparisons between the telomeric repeats and the  
529 observed basecalling repeat artifacts are also highlighted in the plots. **(d)** Example pairs of k-  
530 mer repeats with similar current profiles are as indicated. The nucleotides in k-mer 2 that differs  
531 from k-mer 1 is underlined to highlight the nucleotides that differ between the two types of

532 repeats. **(e-f)** Current profiles for repeats which were predicted to be highly similar to each other.  
533 These are depicted for **(e)** TTAGGG telomeric repeats and telomere-like repeat sequences and  
534 **(f)** GCTGCT repeat sequences that were highlighted in purple in Supplementary Figure 7d.  
535  
536





## Supplementary Figure 9

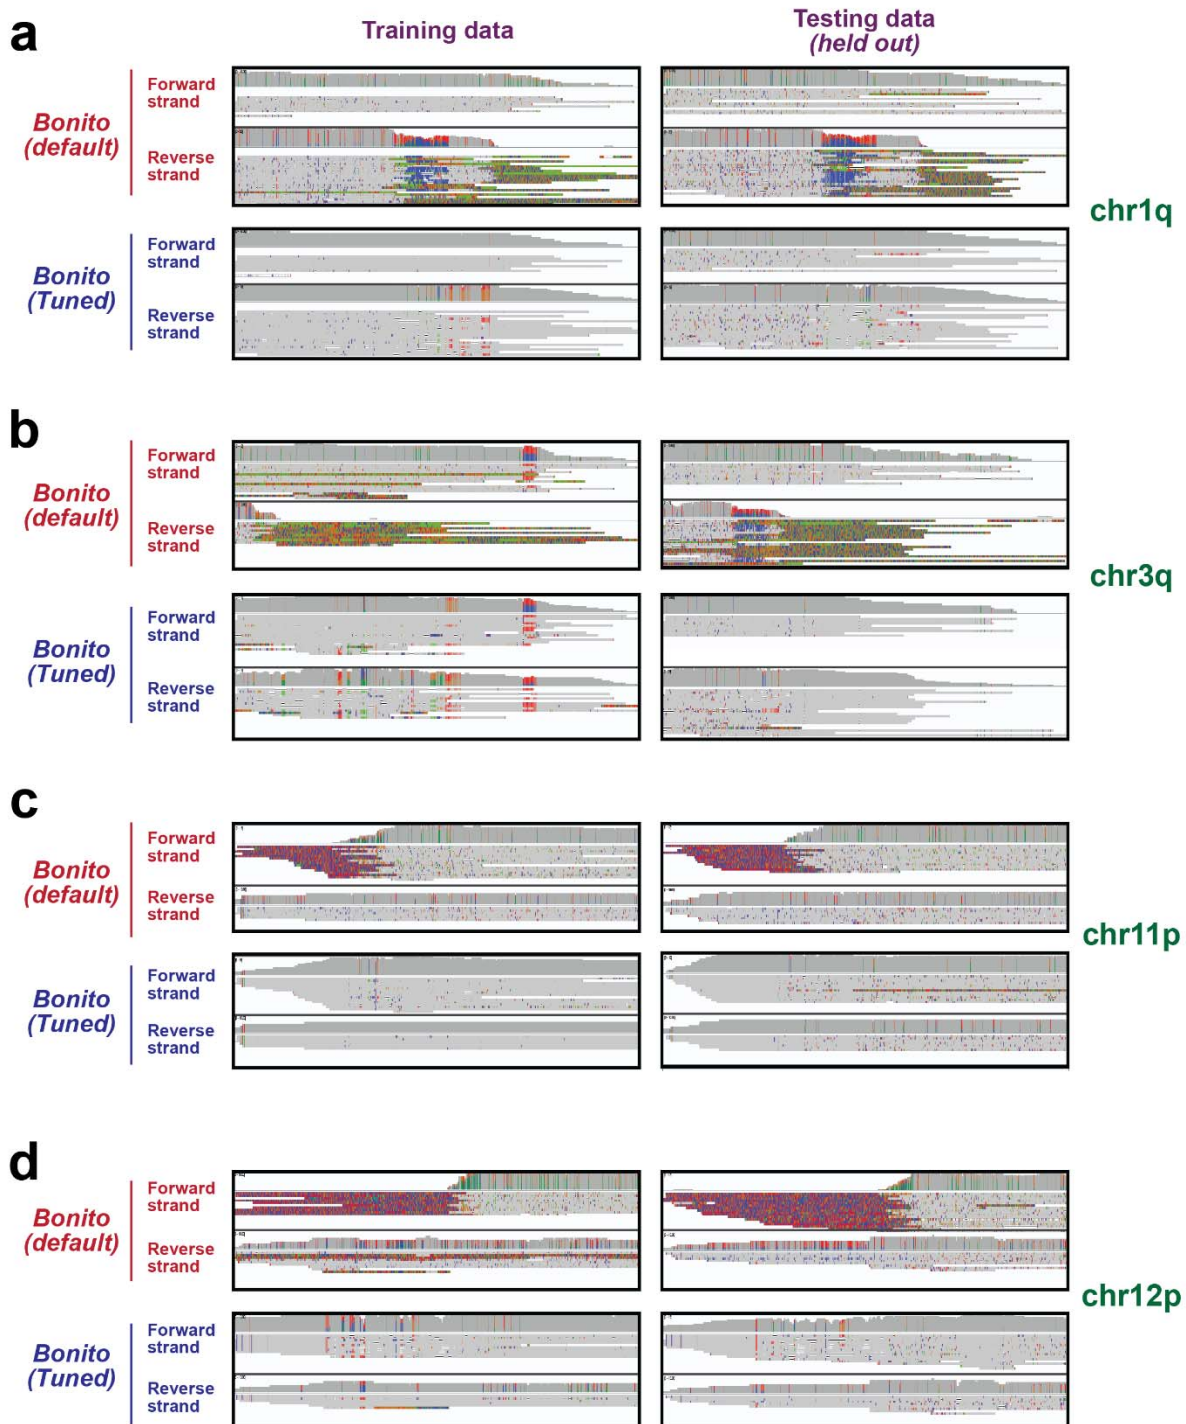

543  
544  
545  
546  
547

**Supplementary Figure 9 Additional examples for the performance of the tuned bonito basecaller on telomeres on other chromosomal arms.** The tuned model was applied to the training dataset used for model training, and on an additional held out test dataset that was not used during model training. IGV screenshots of the default and tuned bonito basecaller on the

548 training and testing dataset for the chromosomal arms **(a)** chr1q, **(b)** chr3q, **(c)** chr11p and **(d)**  
549 chr12p are as depicted. Related to Figure 2b.  
550  
551

## Supplementary Figure 10

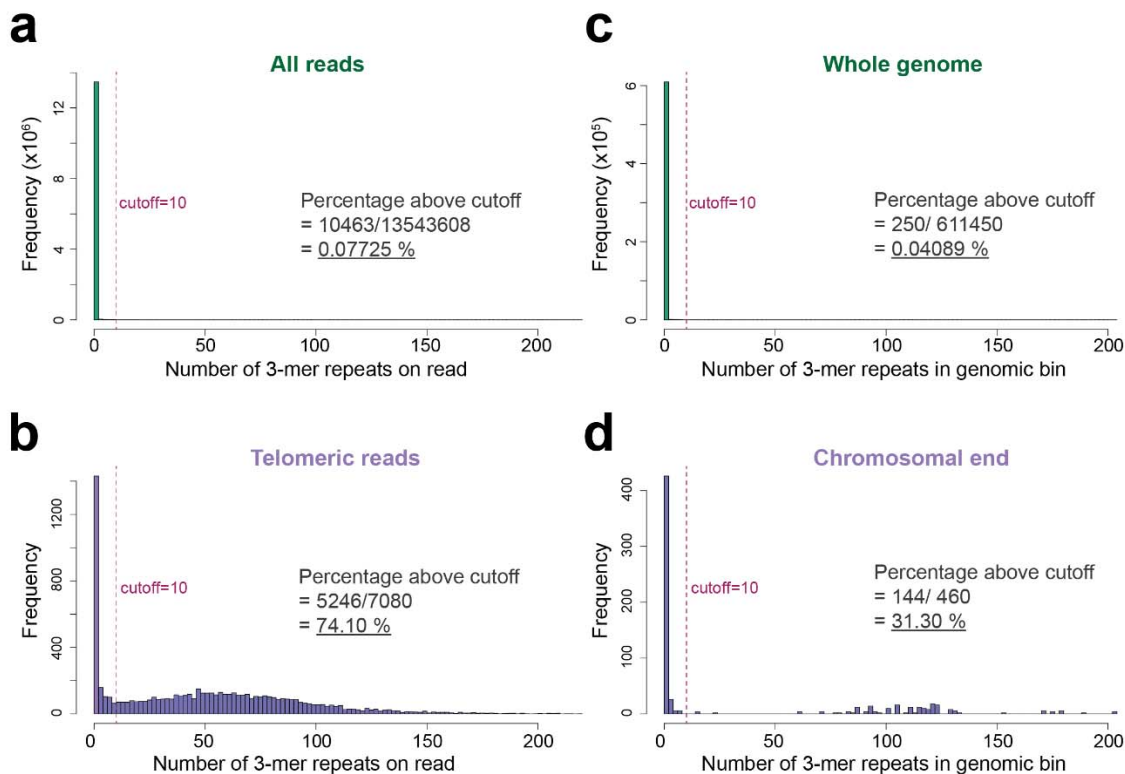

552  
553 **Supplementary Figure 10 Histograms depicting the frequencies of 3-mer repeats on**  
554 **reads at telomeres and on reads found at the rest of the genome in the CHM13 dataset.**  
555 **(a-b)** The sum of 3-mer telomeric repeats [(TTAGGG)<sub>3</sub> (CCCTAA)<sub>3</sub>] and basecalling error  
556 repeats [(TTAAAA)<sub>3</sub>, (TTTTAA)<sub>3</sub>, (CTTCTT)<sub>3</sub>, (AAGAAG)<sub>3</sub>, (CCCTGG)<sub>3</sub>, (CCAGGG)<sub>3</sub>] on **(a-b)**  
557 each long-read or **(c-d)** genomic bin are as depicted on the x-axis of each histogram. The  
558 histograms represent the frequency of these repeats on **(a)** all long-reads in the CHM13 dataset,  
559 **(b)** telomeric reads in the CHM13 dataset, **(c)** 20 kb genomic bins with 10 kb moving window for  
560 the full CHM13 reference genome, **(d)** and for the 10 genomics bins on each chromosomal end  
561 of the CHM13 genome.

562  
563

564 **Supplementary Tables**

565

566 **Supplementary Table 1 List of k-mers with high similarities in current profiles.** The  
567 pearson correlation, Euclidean distance, and mean current difference between each pair of k-  
568 mer is as presented in the table.
